# Supplementary material
Source: PubMed Central journal article supplement (PMC521950)
Supplement: pnas_101_40_14539__2.pdf [file pnas_101_40_14539__2.pdf]

AtCPL1 1 M---YSNNRVEV-----FHDGRLGELIYPSRELNQOQDDVVKQRKKK  
AtCPL2 1 M---NRIGHKSVV-----YHGDRLGELDVNH---VSSSHEFRF----P  
OsCPL1 1 M---VMIMIKSVV-----YGSTSHGHVFWP---KGGTDLAV---AAW  
OsCPL2 1 MATPRAPPQAVPGGGAGATAGVTRMRHFHGDVFLGAEVFP---MKOGAEGS---PFP

AtCPL1 42 QREVMELAKMGRISHFSQSGERCPLAILTTISSCGCFKLEASP---SP-AQESLSLF  
AtCPL2 35 NDEI-----RIHHLSPAGERCPLAILOTIASFVRCLESSA---PVKSOELMHL  
OsCPL1 36 AREI-----RVDHLSPPSERCPLAIVHAAVANGRCCLVMSRPTATADEPPPLVAM  
OsCPL2 55 SNEI-----RISHLSPISERCPLAILQTIAPFSSVRCKLOAKL---MP-PHPSLHRL

AtCPL1 98 YSSCLRENKTAVMILGCEELHLVAMYSENIKNDRPCFWAFSVVAPGIYDSCLVMLNLRCLG  
AtCPL2 83 HAVCFHKLKTAVMVLGDEEHLVAMPKSKKK--FPCFWCFVSPSGLYDSCLRMLNTRCLG  
OsCPL1 88 HAACLREKGTAVFPLGAEELHLVAMISKRNLPNACFWGKVPVSGLYNSCLSLMLNLRCLG  
OsCPL2 103 YLTCFNEYKSAVVVVGDEEHLVAMPKSKVEK--VPCFWCQSVRSGIYASVGMNLNLRCLA

AtCPL1 158 IVFDLDELIVANTMRSFEDRIKIDGSRORINEMDPRORLAVIVAENKRYODDKNLLKQYIE  
AtCPL2 141 IVFDLDELIVANTMRSFEDRIEALKSWISREMDPVRINGMSAEIKRYMDRMLLKQYID  
OsCPL1 148 IVFDLDELIVANTMRSFEDRIDALORKISNEIDPHIISGMSAEIKRYODKRSLLKQYIE  
OsCPL2 161 IVFDLDELIVANTMRSFEDRIEMLSRRMDIEDDPVRIAGMSAEIKRYIDRELLKEIID

AtCPL1 218 SDOVVENGELVKVQSEIVPALSDNHQPLVRLIRLQEKNIILTRINPMIRDTSVLVRLRP  
AtCPL2 201 NDYAFDNGVLLKACPSEVPTSDGQEKVCRPVIRLPEKNIVLTRIKPEIRDTSVLVRLRP  
OsCPL1 208 NDOVILGGVYKVOEVIPLIPDNHQPTRPIRLQEKNIILTRINPLIRDTSVLVRLRP  
OsCPL2 221 TDVTVDNGRIVGTQKEEVLPSGGQERVLRPVIRLPERNALILTRINPEIRDTSVVFVRLRP

AtCPL1 278 SWEELRSYLTAKGRKRFEVYVCTMAERDYALEMWRLLDPECNLINDILARIVCVKSGF  
AtCPL2 261 AWEELRSYLTAKTRKRFEVYVCTMAERDYALEMWRLLDPEAHLISLRELRDRIVCVKPD  
OsCPL1 268 AWEDLRSYLTAKGRKRFEVYVCTMAERDYALEMWRLLDPSRLINSVOLDRIVCVKSGS  
OsCPL2 281 AWEDLRSYLTAKGRKRFEVYVCTMAERDYALEMWRLLDPEANLISSENLAEIRIVCVKSGS

AtCPL1 338 KKSLELVNVLDCGCHPKMALVIDDRLLKVVWDEKQDPRVHVVPAPYYSPOAEAA-ATPVLC  
AtCPL2 321 KKSLELVNVLDCGCHPKMALVIDDRLLKVVWDEKQDPRVHVVPAPYYSPOAEAA-ATPVLC  
OsCPL1 328 KKSLELVNVLDCGCHPKMALVIDDRLLKVVWDEKQDPRVHVVPAPYYSPOAEAA-ATPVLC  
OsCPL2 341 KKSLELVNVLDCGCHPKMALVIDDRLLKVVWDEKQDPRVHVVPAPYYSPOAEAA-ATPVLC

AtCPL1 397 VARNVACGVRGGFFRFDFDLSLLPRIAIEISYENDAEIDPSPPDVSHYLVSEDDTSG-LNGN  
AtCPL2 381 VARNVACNVRGYFFKFEDESLMSSISLVYYEDDENLPPSPDVSNYVIEDPGFA-SNGN  
OsCPL1 388 FARNVACNVRGGFFRFDFDLSLLPRIAIEISYENDAEIDPSPPDVSHYLVSEDDTSG-LNGN  
OsCPL2 401 VARNVACNVRGGFFRFDFDLSLLPRIAIEISYENDAEIDPSPPDVSHYLVSEDDTSG-LNGN

AtCPL1 456 KD-PLSFDMADTEVERRLKEAISASSAVLPA-ANIDPITAAPVQFPMASASSVSVVPV  
AtCPL2 440 INAPPLINEGMCGEVERRLNQAADHSTLPATSNAEQKPEP-----  
OsCPL1 448 KD-PLAFDMADAVERRLKEVSCVQAVNPIPTNADVMVAP-----N  
OsCPL2 459 KDVPAPPEGMSGAEVCKRLN-----GLIKS-AN-DAYFYDD-----

AtCPL1 514 QVVQQAIOPSAMAFPSIPF---QPPCOPTSIKHLVPS-EPSSLQSSPAREEGEVPESELD  
AtCPL2 483 -----KPOLAVIP-----NMASTATAALPSHKPSLGGAP-RRDG-----FTF  
OsCPL1 491 QOITSSVPEAPSLGNIPLNNDGPPPPSNPVAQSAVPS-QSSPAREEGEVPESELD  
OsCPL2 493 -----DCVALRGIP-----G

AtCPL1 570 PDTRRRLLILOHGQDTRDPAPEPSPFQPPVQAPPSHVQSRNGWFFVEEMDPAQVRRRA  
AtCPL2 521 SDGGRFLM-MRFGVDLRNQNFPILAKIPQPPSSSHSPGGWL-VVDENRPSFPCRP  
OsCPL1 550 PDTRRRLLILOHGQDTRDPA---PPCPAGSEVQTSVLPVQSHGNMSHVEDEMNSRNRT  
OsCPL2 503 -----GTVN-----VQSNNG-----

AtCPL1 630 VSKEYPLDSEMIHMKHRPSPHSPFSKIDNSTQSDRMLLENRREPKESLRDREOLRSNNN  
AtCPL2 579 -SGLYP-----SQFPHGTP-----GSAPVGFAPPSHLRSEEAMDDDLKRONPS  
OsCPL1 607 -STGHELESDDINYDKKOPHNPPYFPEEDNLITSDRYNRRIHRVPSQLPSEDEHMLNRS  
OsCPL2 512 -----

AtCPL1 690 LPDSLEPYGEDA--SNQSSSRNSDIDFLPERSVATETSADVHGILKCGAKVEYKPS  
AtCPL2 623 ---ROHTEGGISQNL-VSNGREHETDG-GKSNNGGOSHLFVSAQOEIGRCGSKVEFRTV  
OsCPL1 666 SIAYRSFPGEDMGNRRGSPNSRSSKIEP-GHOFVQNAETSAGVLEIIVCECGKVEYQST  
OsCPL2 512 -----SLATPPLFVTVLQOEIGRLCESNV-----

AtCPL1 748 LVSSTDLRFVSEAWLSNOKIGEGIGKSRREALKAAEASQNLANGYVRANGDPGPHRD  
AtCPL2 678 LSTNKLELQFSVEVLFCEKIGIGMAKTKKBAHQAAENARSLAEKYV-----AH  
OsCPL1 725 LCSTAELOFSLEVRIIGEKVCEGIGKTRKAAKROAVNMSLRNLAEKFL-----TSDPD  
OsCPL2 536 -----LFSNEKIGIGKTRDEAQLAAEKALONLESNYL-----SFMAP

AtCPL1 808 ATPFTNENISMGNANALNNOFFARDETALPVSSRPTL-----PRLEGSMRHIGSITALKE  
AtCPL2 728 VAPLARET---EKGEENDNGFLWESSE-DVSNKGLEEAPKENISEL  
OsCPL1 778 KMMILKENGFSNNSNFRYSGSRDITTS-PVASTSNESRYMGERMDTLRNPAGSVAALKE  
OsCPL2 576 VAGVLLKQDV---NRPFGSNGFLEDITL-----SEDLIS-DEEPSGS---TLKE

AtCPL1 863 LCASEGLEMAFQSQRCQPSDMVHRDELHAQVEIDGRVVGEGVGSFWDEARMQAAERALS  
AtCPL2  
OsCPL1 837 LCTVEGYNVPEQEPSRPRGSSGK-FAYAQVEIGGQILGKVGATWEQAKLQAADEALGN  
OsCPL2 617 -----QDHSKALDRLLSSVIS---LIR-EL---AELGGQILGRGIDLNKDFAKLQAAEBAKKT

AtCPL1 923 VRSMLGQPLHKRQGSFRSFGGMSN-KRLKPDFORSLQRPSSGRYS  
AtCPL2  
OsCPL1 896 LKSMGLIFAHKSSGFORS-SV-SNFRKPDFORSLOTTPSGWDSRNRNGRVL  
OsCPL2 667 LKTTTDPQIKKHLRPMQQLNFPLYPTKALQIMDIFTRSPQEHHISITEMIEK
