# Supplementary material
Source: PubMed Central journal article supplement (PMC521950)
Supplement: pnas_101_40_14539__4.pdf [file pnas_101_40_14539__4.pdf]

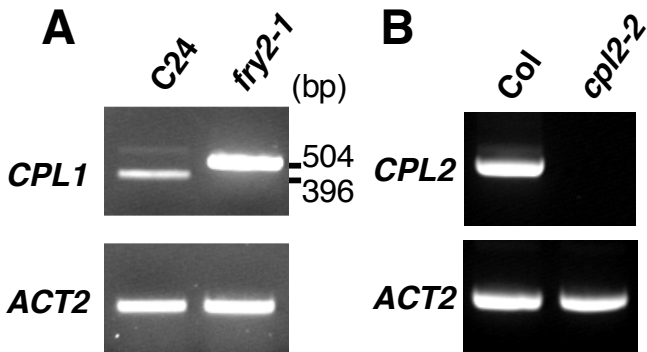

**C**

genome 3556 TGATAACTCAACTCAGTCTGACAGGATGCTTCATGAGAATCGCAGGCCGC  
 cDNA 1971 TGATAACTCAACTCAGTCTGACAGGATGCTTCATGAGAATCGCAGGCCGC  
 fry2-1 1971 TGATAACTCAACTCAGTCTGACAGGATGCTTCATGAGAATCGCAGGCCGC  
 Protein D N S T Q S D R M L H E N R R P P

genome CAAAGGAGgtaccactaatcttattttaacctatgattttacagttgtcag  
 cDNA CAAAGGAG-----  
 fry2-1 CAAAGGAGATACCACTAATCTTATTTAACCTATGATTTTACAGTTGTCAG  
 K E I P L I L F N L \*

genome tttttttggtctttatactgctgtacgacgtttagtgctcactgtgatat  
 cDNA -----  
 fry2-1 TTTTTTTGGTCTTTATACTGCTGTACGACGTTTAGTGCTCACTGTGATAT

genome atttgacagTCTCTCCGGAGAGATGAACAGTTACGTTCAAATAACAATCTA  
 cDNA -----TCTCTCCGGAGAGATGAACAGTTACGTTCAAATAACAATCTA  
 fry2-1 ATTTGCAGTCTCTCCGGAGAGATGAACAGTTACGTTCAAATAACAATCTA

genome CCTGACTCTCATCCTTTCTATGGtaagccatcaaagttatttgttcttgt  
 cDNA CCTGACTCTCATCCTTTCTATGG-----  
 fry2-1 CCTGACTCTCATCCTTTCTATGG-----

genome atcattttgttctgaagataaatcactgacttgggtattgggatggactc  
 cDNA -----  
 fry2-1 -----

genome tctagggGAGGATGCGTCTTGGAAATCAATCTTCCTCTAGGAACAGTGATC  
 cDNA -----GGAGGATGCGTCTTGGAAATCAATCTTCCTCTAGGAACAGTGATC  
 fry2-1 -----GGAGGATGCGTCTTGGAAATCAATCTTCCTCTAGGAACAGTGATC
