# Supplementary material
Source: PubMed Central journal article supplement (PMC521950)

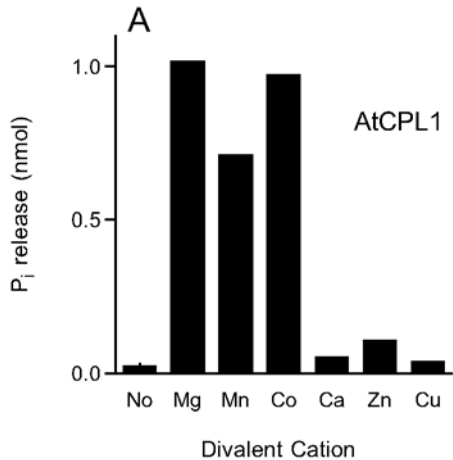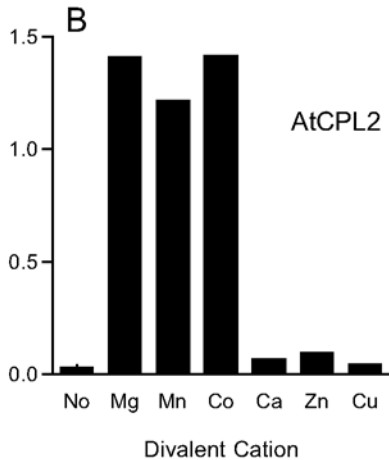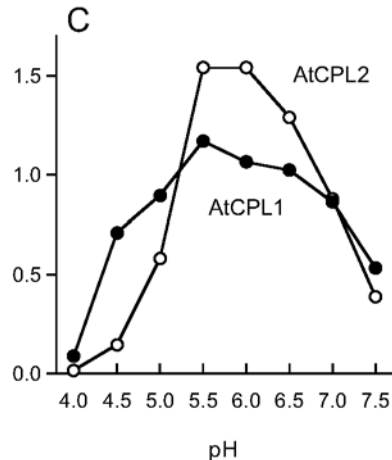

Supplement: pnas_101_40_14539__3.pdf [file pnas_101_40_14539__3.pdf]

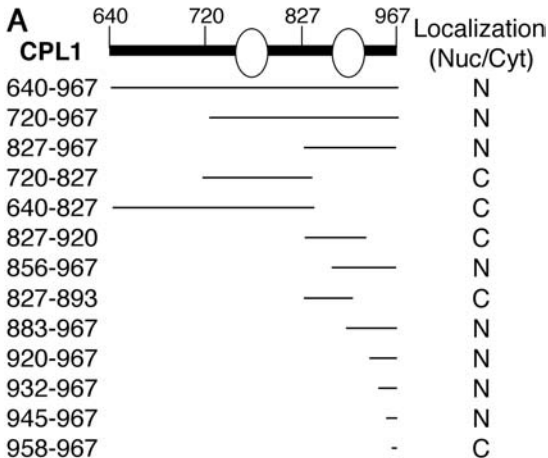

**B**

945 967

AtCPL1 SN-KRLKPDFQ**RS**LQ**R**MPSSGRYS

OsCPL1 SNFNRFKPDFQ**RS**LQ**T**IPSGWDSRNNGRVL

Supplement: pnas_101_40_14539__5.pdf [file pnas_101_40_14539__5.pdf]
